# Supplementary material for: Effect on Cellular Vitality In Vitro of Novel APRF-Chlorhexidine Treated Membranes
Source: MDPI journal article supplement (doi:10.3390/jfb13040226), 2022-11-07
Supplement: s1 [file s1]

Article

# Effect on Cellular Vitality In Vitro of Novel APRF-Chlorhexidine Treated Membranes

Tasho Gavrilov <sup>1,\*</sup>, Ivan Chenchev <sup>1,2</sup>, Maria Gevezova <sup>2,3</sup>, Milena Draganova <sup>2,3</sup> and Victoria Sarafian <sup>2,3</sup>

<sup>1</sup> Department of Oral surgery, Medical University—Plovdiv, 4000 Plovdiv, Bulgaria

<sup>2</sup> Research Institute at MU-Plovdiv, 4000, Plovdiv, Bulgaria

<sup>3</sup> Department of Medical Biology, Medical University—Plovdiv, 4000 Plovdiv, Bulgaria

\* Correspondence: tasho.gavrilov@mu-plovdiv.bg

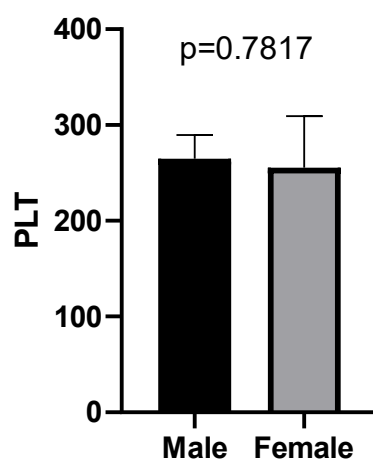

**Supplementary Figure S1.** No statistically significant difference between men (10) and women (11) in platelet counts.
